# Supplementary material for: Tuning of spin crossover equilibrium in catecholatoiron(iii) complexes by supporting ligands
Source: Royal Society of Chemistry journal article supplement (doi:10.1039/b418678h), 2005-01-01
Supplement: b418678h.pdf [file b418678h.pdf]

## Supporting Information

### Tuning of Spin Crossover Equilibrium in Catecholatoiron(III) Complexes by Supporting Ligands

Yutaka Hitomi,\*<sup>a</sup> Masakazu Higuchi,<sup>a</sup> Hisataka Minami,<sup>a</sup> Tsunehiro Tanaka<sup>a</sup> and Takuzo Funabiki\*<sup>b</sup>

<sup>a</sup> Department of Molecular Engineering, Kyoto University, Address, Kyoto Daigaku Katsura, Nishikyo-ku, Kyoto 615\_8510, Japan. Fax: 81 75 383 2561; Tel: 81 75 383 2562; E-mail: hitomi@moleng.kyoto-u.ac.jp

<sup>b</sup> Biomimetics Research Center, Doshisha University, Kyo-Tanabe, Kyoto 610-0321, Japan. E-mail: funabiki@scl.kyoto-u.ac.jp

**Figure S1** Magnetic susceptibility of **1–5** in CH<sub>3</sub>CN from 243 K to 303 K (left) and in the solid state from 5 K to 340 K (right).

**Figure S2** Variable temperature UV-vis-NIR spectra of **1** (A), **2** (B), **3** (C), and **4** (D). The arrows represent the changes as temperature is lowered from 303 K to 243 K.

**Figure S3** <sup>1</sup>H NMR spectra of **1–5** in CD<sub>3</sub>CN at 298 K. (a) **1**. (b) **2**. (c) **3**. (d) **4**. (e) **5**.

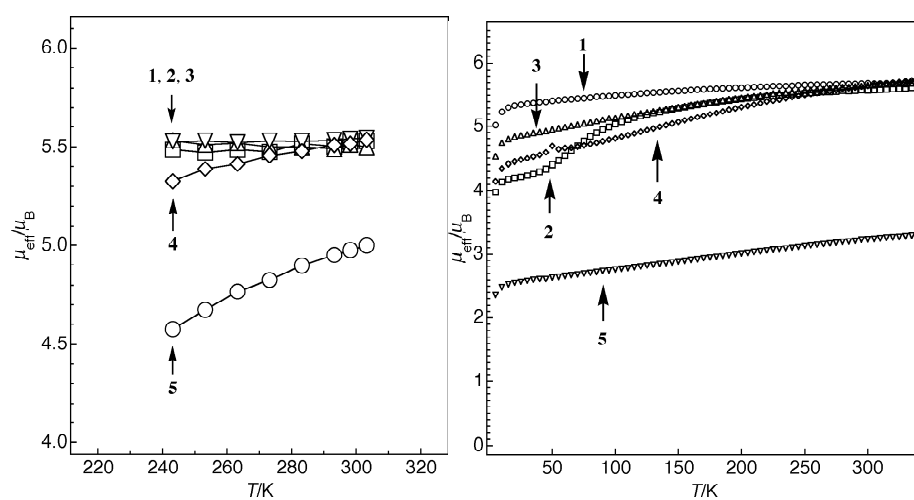

**Figure S1** Magnetic susceptibility of **1–5** in CH<sub>3</sub>CN from 243 K to 303 K (left) and in the solid state from 5 K to 340 K (right).

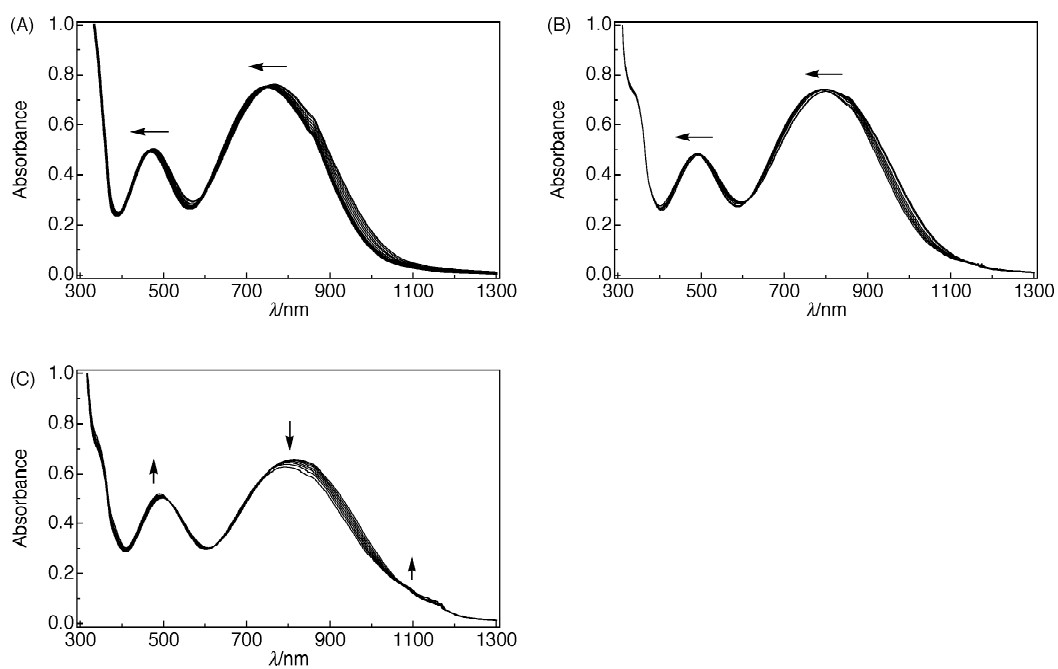

**Figure S2** Variable temperature UV-Vis-NIR spectra of **1** (A), **3** (B), and **4** (C). The arrows represent the changes as temperature is lowered from 303 K to 243 K.

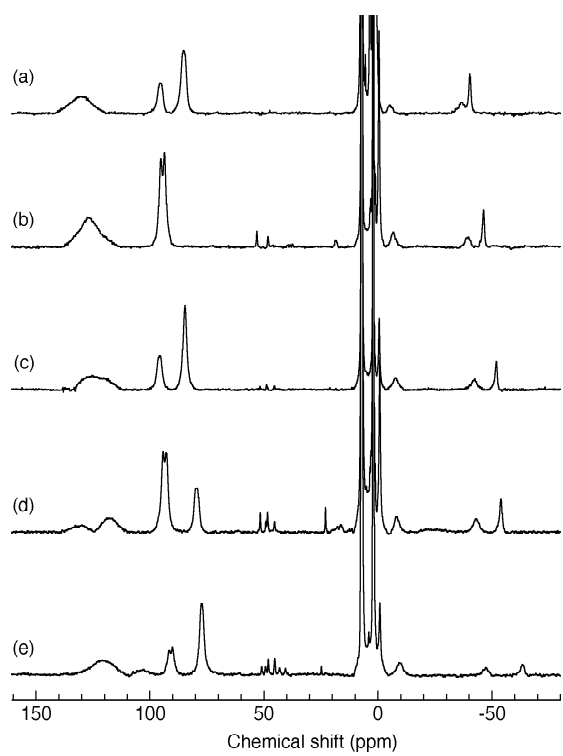

**Figure S3**  $^1\text{H}$  NMR spectra of **1–5** in  $\text{CD}_3\text{CN}$  at 298 K. (a) **1**. (b) **2**. (c) **3**. (d) **4**. (e) **5**.
